# Supplementary material for: Synthesis, structures and magnetic properties of Fe(ii) and Co(ii) thiocyanato coordination compounds: on the importance of the diamagnetic counterparts for structure determination
Source: Royal Society of Chemistry journal article supplement (doi:10.1039/c3dt51085a), 2013-01-01
Supplement: c3dt51085a.pdf [file c3dt51085a.pdf]

Supporting Information

**Synthesis, Structures and Magnetic Properties of Fe(II) and  
Co(II) Thiocyanato Coordination Compounds: On the  
Importance of the Diamagnetic Counterparts for Structure  
Determination.**

Susanne Wöhlert, Lars Peters and Christian Näther

---

|          |                                                                                                          |    |
|----------|----------------------------------------------------------------------------------------------------------|----|
| Fig. S1  | Experimental and calculated XRPD of <b>1-Co</b>                                                          | 2  |
| Fig. S2  | Experimental and calculated XRPD of <b>2-Co</b>                                                          | 2  |
| Fig. S3  | Experimental and calculated XRPD of <b>3-Co</b>                                                          | 3  |
| Fig. S4  | Experimental and calculated XRPD of <b>1-Fe</b>                                                          | 3  |
| Fig. S5  | IR spectrum of <b>1-Co</b>                                                                               | 4  |
| Fig. S6  | IR spectrum of <b>2-Co</b>                                                                               | 4  |
| Fig. S7  | IR spectrum of <b>3-Co</b>                                                                               | 5  |
| Fig. S8  | IR spectrum of <b>1-Fe</b>                                                                               | 5  |
| Fig. S9  | ORTEP plot of <b>1-Fe</b>                                                                                | 6  |
| Fig. S10 | ORTEP plot of <b>2-Co</b>                                                                                | 6  |
| Table S1 | Selected bond lengths and angles for <b>1-Fe</b> and <b>2-Co</b>                                         | 7  |
| Fig. S11 | ORTEP plot of $\text{Co}(\text{NCS})_2(2\text{-methylpyrazine})_4 \cdot 2\text{-methylpyrazine}$ solvate | 7  |
| Table S2 | Selected bond lengths and angles for <b>3-Co</b>                                                         | 8  |
| Fig. S12 | IR spectrum of the residue obtained in the first heating step of <b>1-Co</b>                             | 9  |
| Fig. S13 | IR spectrum of the residue obtained in the first heating step of <b>2-Co</b>                             | 9  |
| Fig. S14 | IR spectrum of the residue obtained in the first heating step of <b>3-Co</b>                             | 10 |
| Fig. S15 | IR spectrum of the residue obtained in the first heating step of <b>1-Fe</b>                             | 10 |
| Fig. S16 | IR spectrum of the residue obtained in the second heating step of <b>1-Co</b>                            | 11 |
| Fig. S17 | IR spectrum of the residue obtained in the second heating step of <b>2-Co</b>                            | 11 |
| Fig. S18 | IR spectrum of the residue obtained in the second heating step of <b>3-Co</b>                            | 12 |
| Fig. S19 | IR spectrum of the residue obtained in the second heating step of <b>1-Fe</b>                            | 12 |
| Table S3 | Selected bond lengths and angles for <b>5-Cd</b>                                                         | 13 |
| Fig. S20 | IR spectrum of <b>5-Cd</b>                                                                               | 13 |
| Fig. S21 | Difference plot from the Rietveld refinement for <b>5-Co</b>                                             | 14 |
| Fig. S22 | Difference plot from the Rietveld refinement for <b>5-Fe</b>                                             | 15 |
| Fig. S23 | $\chi_M$ and $1/\chi_M$ as function of temperature for <b>4-Co</b>                                       | 16 |
| Fig. S24 | $\chi_M$ and $1/\chi_M$ as function of temperature for <b>4-Fe</b>                                       | 16 |
| Fig. S25 | Initial curve at 2 K for <b>4-Co</b>                                                                     | 17 |
| Fig. S26 | Initial curve at 2 K for <b>4-Fe</b>                                                                     | 17 |
| Fig. S27 | Initial curve at 2 K for <b>5-Fe</b>                                                                     | 18 |
| Fig. S28 | $\chi_M$ as function of temperature for <b>5-Fe</b>                                                      | 18 |
| Fig. S29 | Saturation magnetization experiment for <b>5-Co</b>                                                      | 19 |
| Table S4 | Results of the magnetic measurements for <b>5-Co</b>                                                     | 19 |
| Fig. S30 | XRPD investigations on solvent exchange in <b>2-Co</b>                                                   | 20 |

---

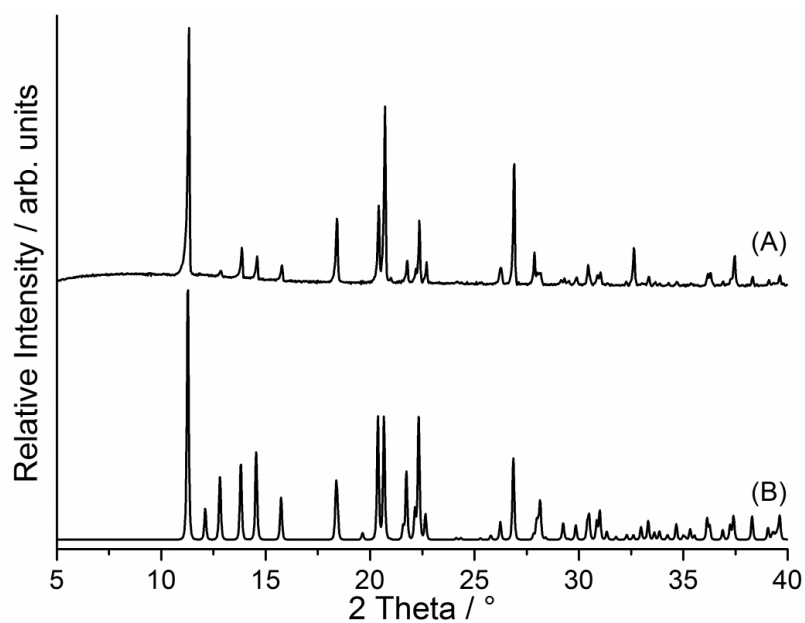

**Fig. S1.** Experimental XRPD pattern of **1-Co** (A) together with the powder pattern calculated from single crystal data (B).

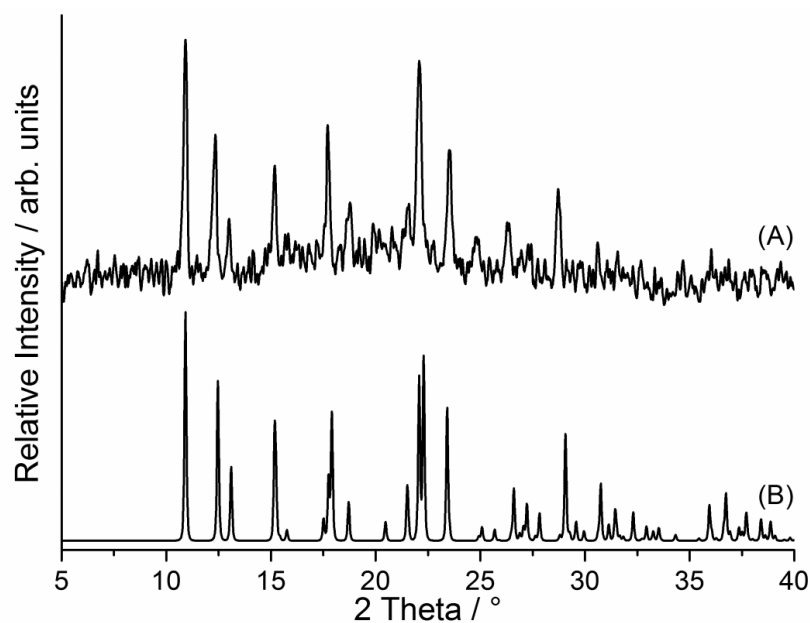

**Fig. S2.** Experimental XRPD pattern of **2-Co** (A) together with the powder pattern calculated from single crystal data (B).

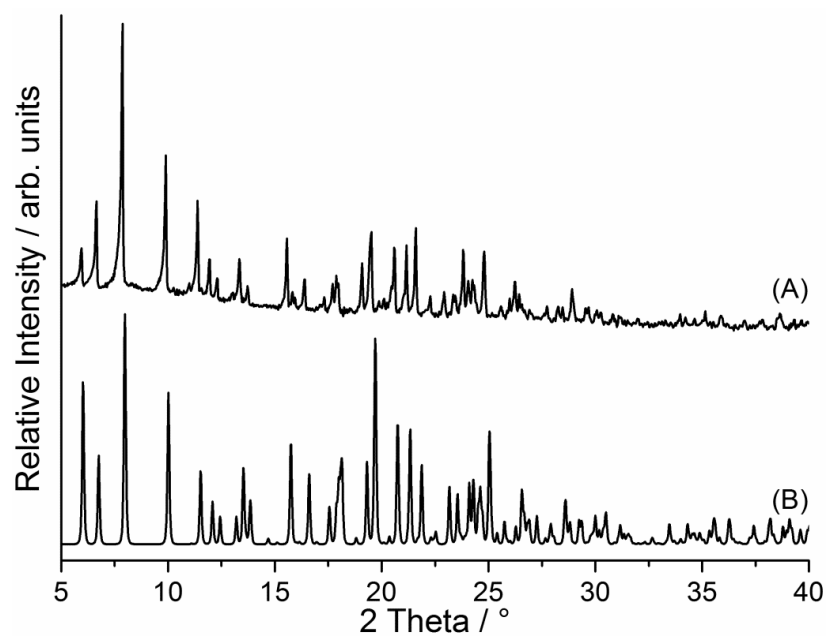

**Fig. S3.** Experimental XRPD pattern of **3-Co** (A) together with the powder pattern calculated from single crystal data (B).

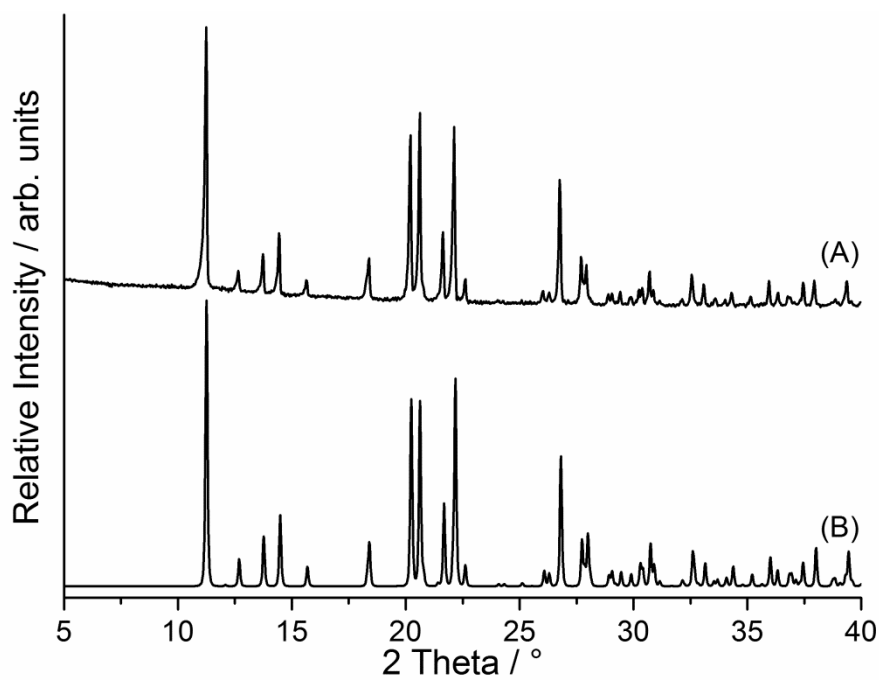

**Fig. S4.** Experimental XRPD pattern of **1-Fe** (A) together with the powder pattern calculated from single crystal data (B).

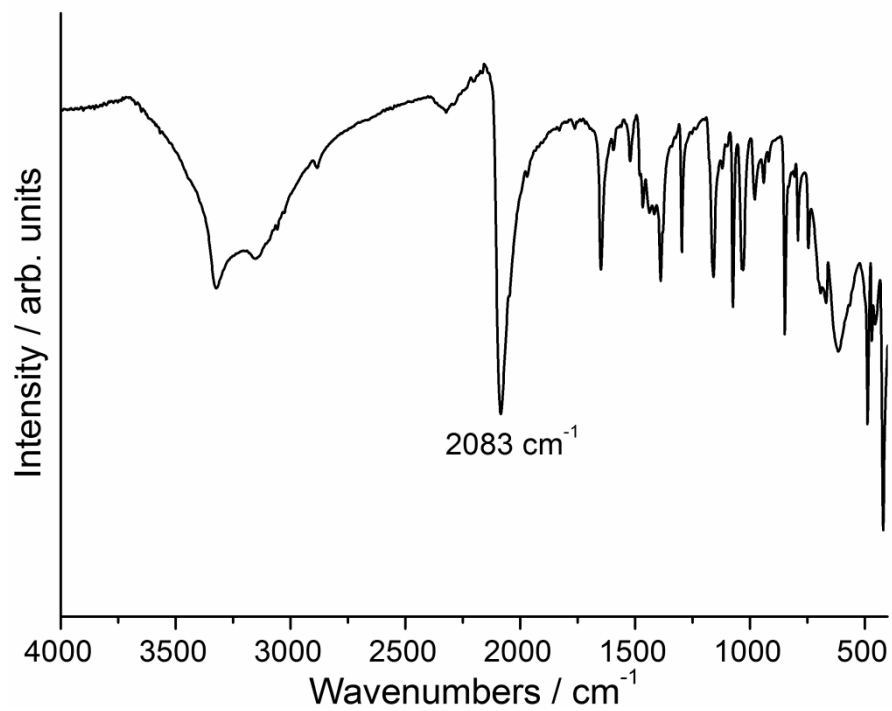

**Fig. S5.** IR spectrum of  $\text{Co(NCS)}_2(2\text{-methylpyrazine})_2(\text{H}_2\text{O})_2$  (**1-Co**).

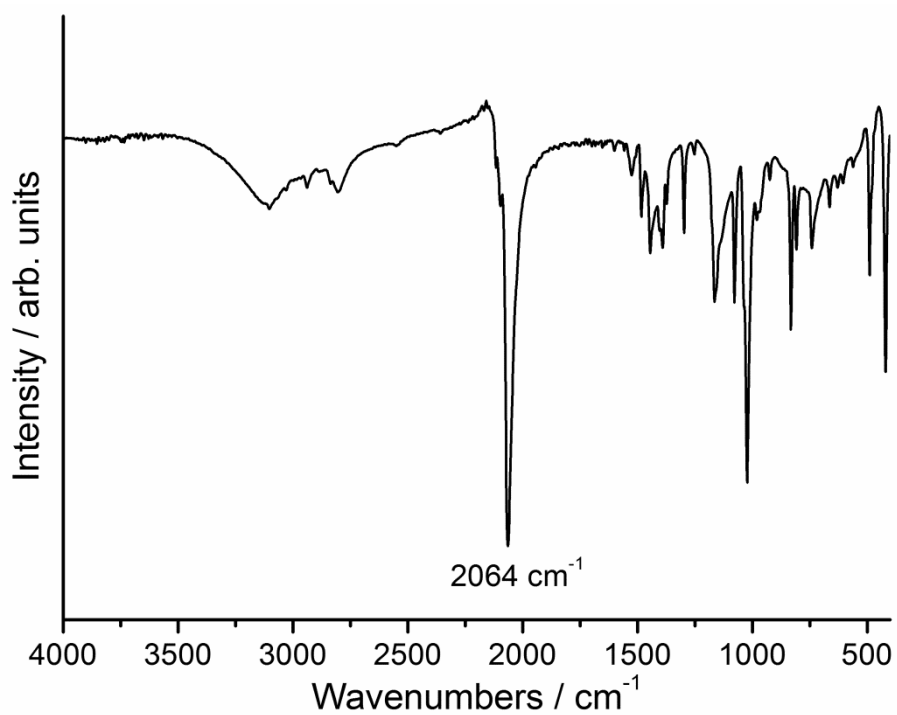

**Fig. S6.** IR spectrum of  $\text{Co(NCS)}_2(2\text{-methylpyrazine})_2(\text{CH}_3\text{OH})_2$  (**2-Co**).

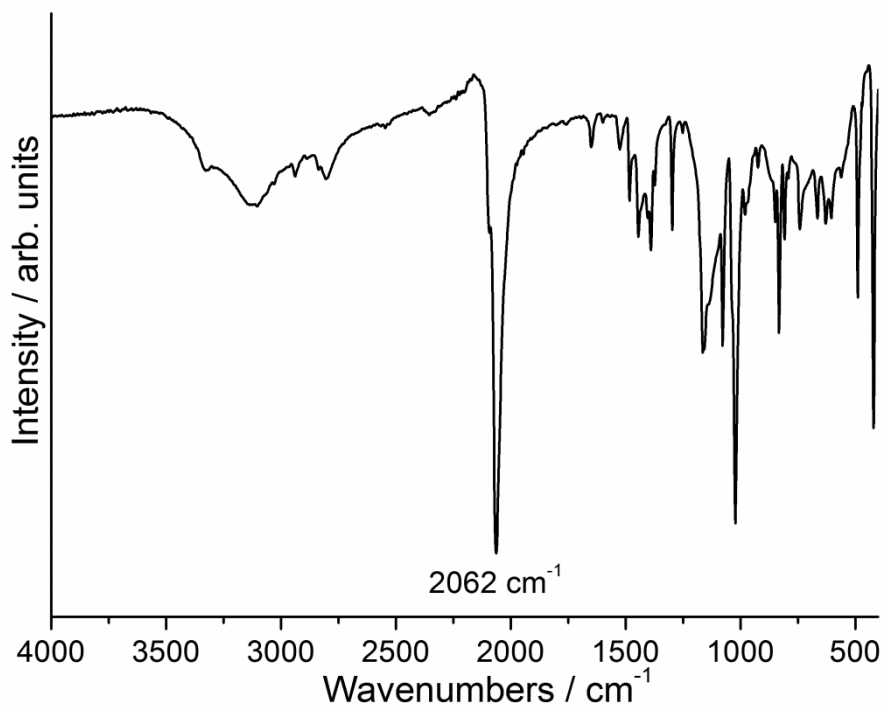

**Fig. S7.** IR spectrum of  $\text{Co}(\text{NCS})_2(2\text{-methylpyrazine})_4 \cdot 2\text{-methylpyrazine}$  solvate (**3-Co**).

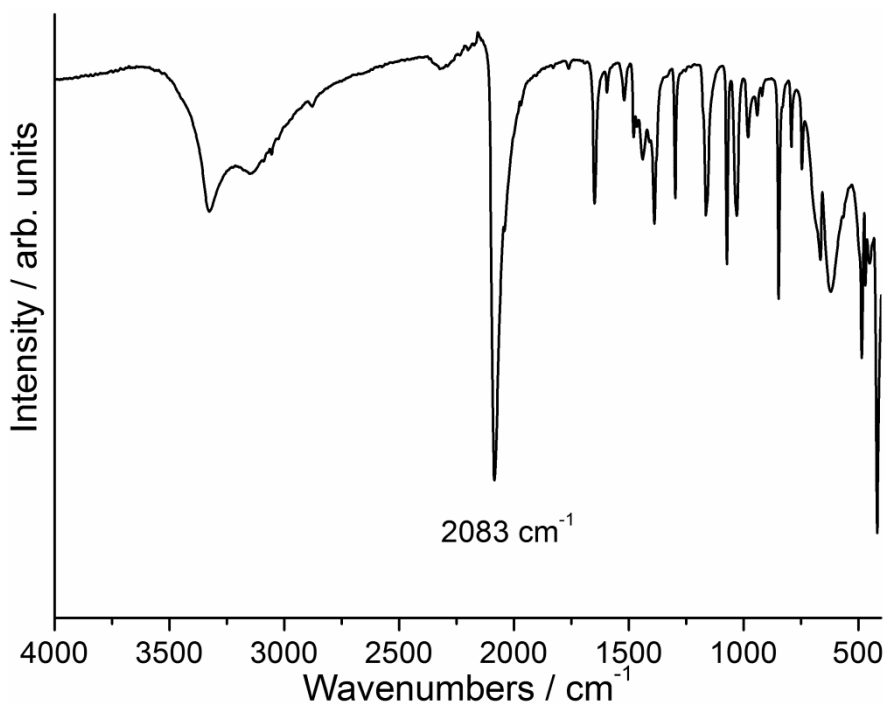

**Fig. S8.** IR spectrum of  $\text{Fe}(\text{NCS})_2(2\text{-methylpyrazine})_2(\text{H}_2\text{O})_2$  (**1-Fe**).

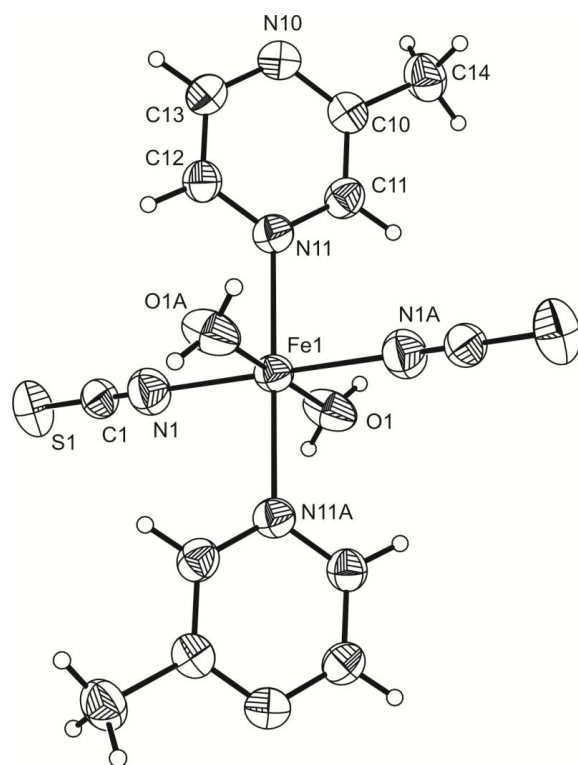

**Fig. S9.** ORTEP plot of  $\text{Fe}(\text{NCS})_2(2\text{-methylpyrazine})_2(\text{H}_2\text{O})_2$  (**1-Fe**). Symmetry transformation used to generate equivalent atoms:  $A = -x, -y, -z + 1$ .

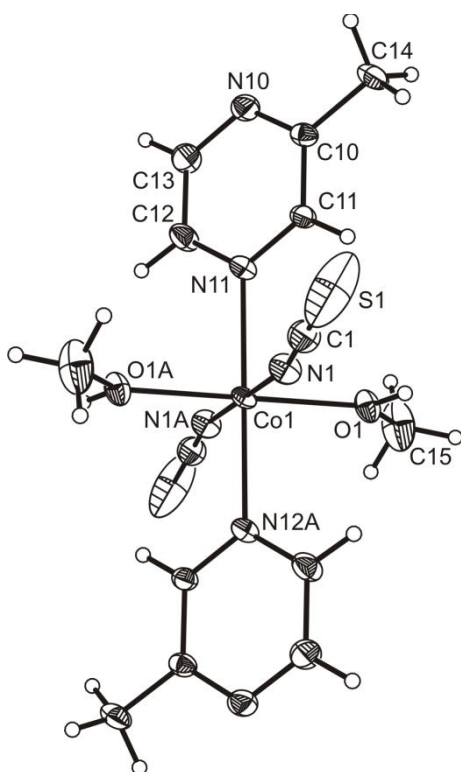

**Fig. S10.** ORTEP plot of  $\text{Co}(\text{NCS})_2(2\text{-methylpyrazine})_2(\text{CH}_3\text{OH})_2$  (**2-Co**). Symmetry transformation used to generate equivalent atoms:  $A = -x, -y, -z + 1$ .

**Table S1.** Selected bond lengths / Å and angles / ° for  $\text{Fe}(\text{NCS})_2(2\text{-methylpyrazine})_2(\text{H}_2\text{O})_2$  (**1-Fe**) and  $\text{Co}(\text{NCS})_2(2\text{-methylpyrazine})_2(\text{CH}_3\text{OH})_2$  (**2-Co**). Symmetry transformation used to generate equivalent atoms:  $A = -x, -y, -z + 1$ .

|                  | <b>1-Fe</b> | <b>2-Co</b> |
|------------------|-------------|-------------|
| M(1)-N(1)        | 2.1104(15)  | 2.063(3)    |
| M(1)-N(11)       | 2.2205(12)  | 2.176(2)    |
| M(1)-O(1)        | 2.1258(11)  | 2.103(2)    |
| N(1A)-M(1)-N(1)  | 180.0       | 180.00(14)  |
| N(1A)-M(1)-O(1)  | 91.38(6)    | 93.02(10)   |
| N(1)-M(1)-O(1)   | 88.62(6)    | 86.98(10)   |
| N(1)-M(1)-N(11)  | 90.46(5)    | 88.60(10)   |
| N(1)-M(1)-N(11A) | 89.54(5)    | 91.40(10)   |
| O(1)-M(1)-O(1A)  | 180.0       | 180.0       |
| O(1)-M(1)-N(11A) | 88.90(5)    | 88.75(9)    |
| O(1)-M(1)-N(11)  | 91.10(5)    | 91.25(9)    |

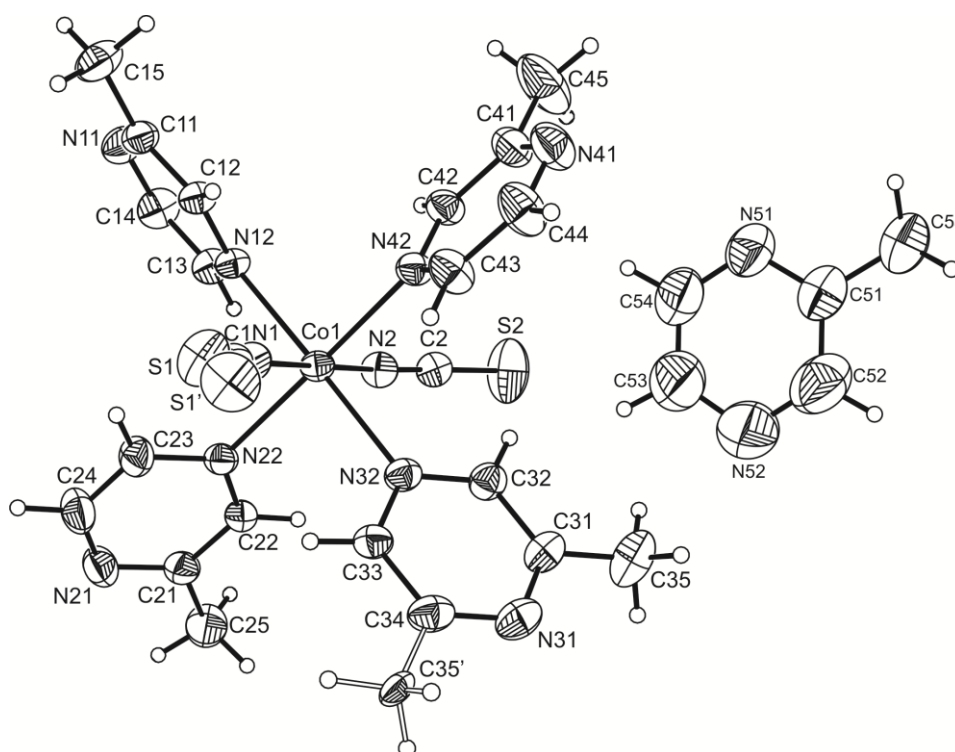

**Fig. S11.** ORTEP plot of  $\text{Co}(\text{NCS})_2(2\text{-methylpyrazine})_4 \cdot 2\text{-methylpyrazine}$  solvate (**3-Co**).

The disordering of the non-coordinated 2-methylpyrazine ligand was omitted for clarity.

**Table S2.** Selected bond lengths / Å and angles / ° for  $\text{Co}(\text{NCS})_2(2\text{-methylpyrazine})_4 \cdot 2\text{-methylpyrazine}$  solvate (**3-Co**).

| <b>compounds</b>  | <b>3-Co</b> |
|-------------------|-------------|
| Co(1)-N(1)        | 2.063(3)    |
| Co(1)-N(2)        | 2.066(2)    |
| Co(1)-N(12)       | 2.191(2)    |
| Co(1)-N(22)       | 2.193(2)    |
| Co(1)-N(32)       | 2.186(2)    |
| Co(1)-N(42)       | 2.168(2)    |
| N(1)-Co(1)-N(2)   | 179.43(10)  |
| N(1)-Co(1)-N(42)  | 89.79(10)   |
| N(2)-Co(1)-N(32)  | 89.68(10)   |
| N(42)-Co(1)-N(32) | 89.37(9)    |
| N(42)-Co(1)-N(12) | 92.03(9)    |
| N(32)-Co(1)-N(12) | 178.57(9)   |
| N(42)-Co(1)-N(22) | 179.08(9)   |
| N(32)-Co(1)-N(22) | 91.38(9)    |
| N(2)-Co(1)-N(42)  | 89.85(10)   |
| N(1)-Co(1)-N(32)  | 89.88(10)   |
| N(1)-Co(1)-N(12)  | 90.43(9)    |
| N(2)-Co(1)-N(12)  | 90.02(9)    |
| N(1)-Co(1)-N(22)  | 89.69(10)   |
| N(2)-Co(1)-N(22)  | 90.67(10)   |
| N(12)-Co(1)-N(22) | 87.22(9)    |



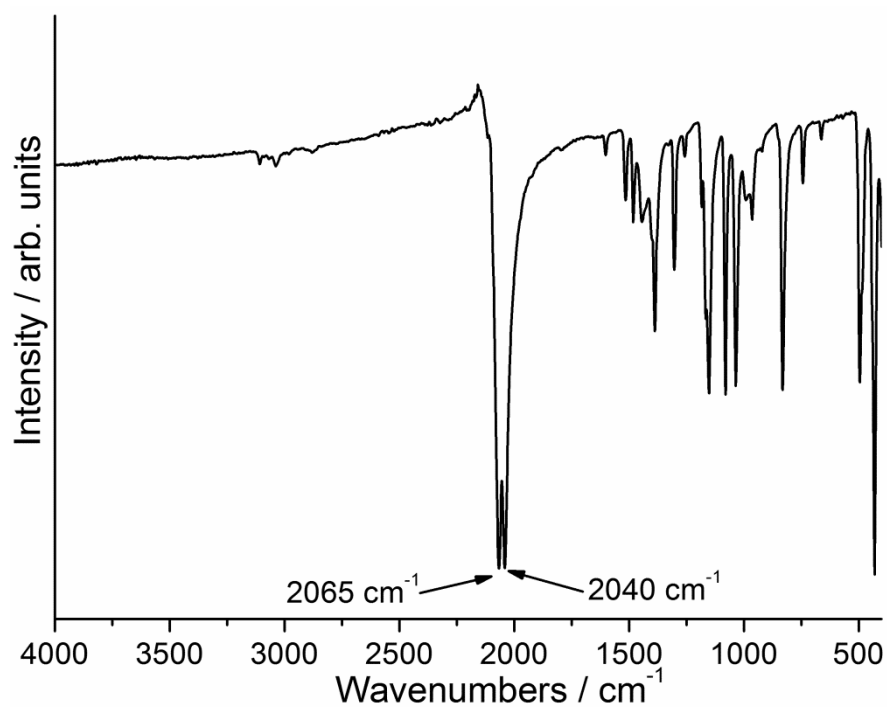

**Fig. S12.** IR spectrum of the residue, which was obtained in the first heating step of compound **1-Co**.

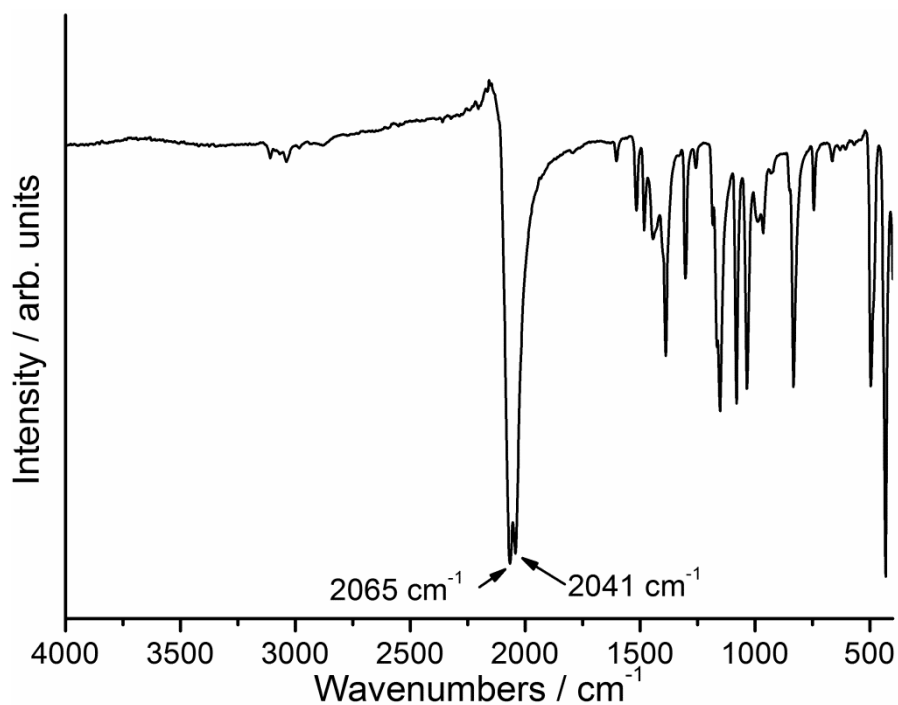

**Fig. S13.** IR spectrum of the residue, which was obtained in the first heating step of compound **2-Co**.

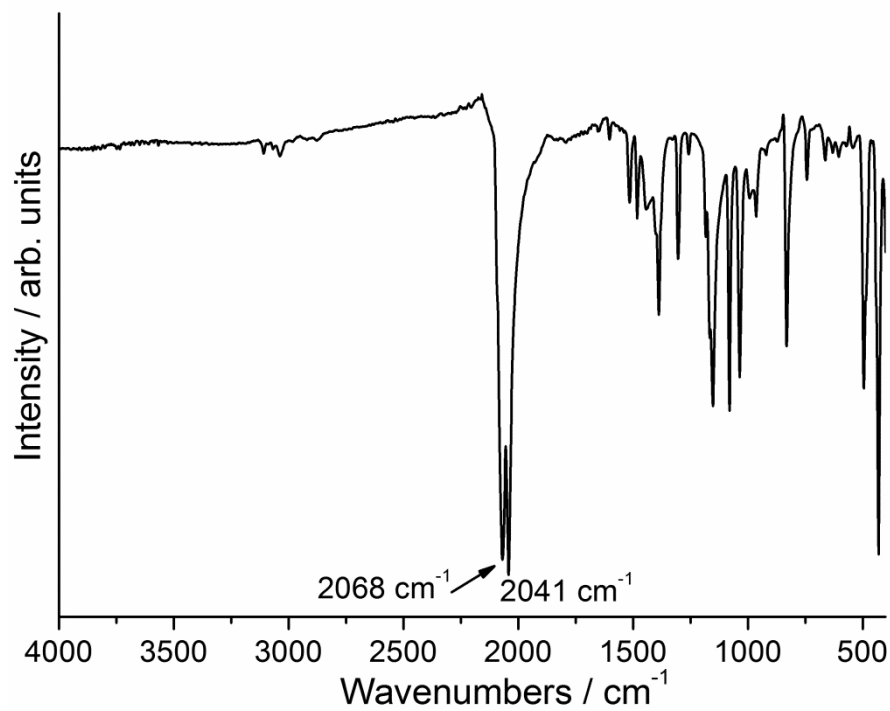

**Fig. S14.** IR spectrum of the residue, which was obtained in the first heating step of compound **3-Co**.

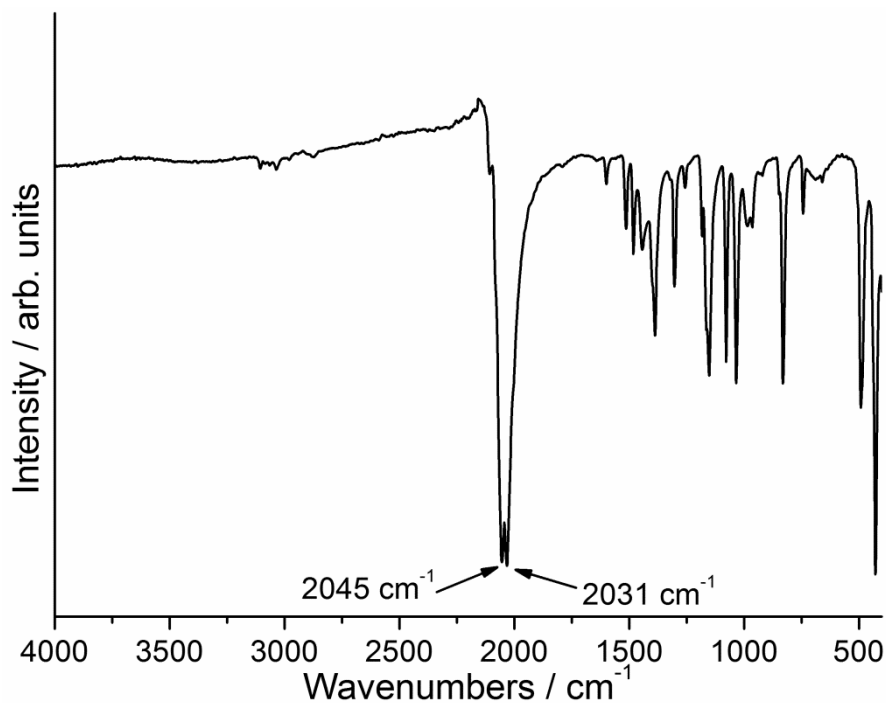

**Fig. S15.** IR spectrum of the residue, which was obtained in the first heating step of compound **1-Fe**.

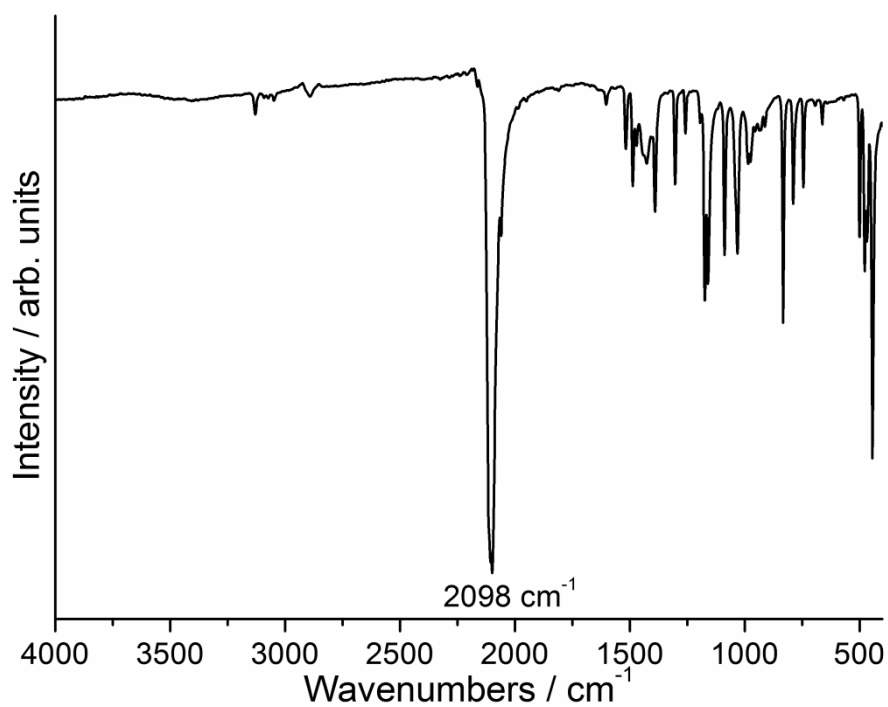

**Fig. S16.** IR spectrum of the residue, which was obtained in the second heating step of compound **1-Co**.

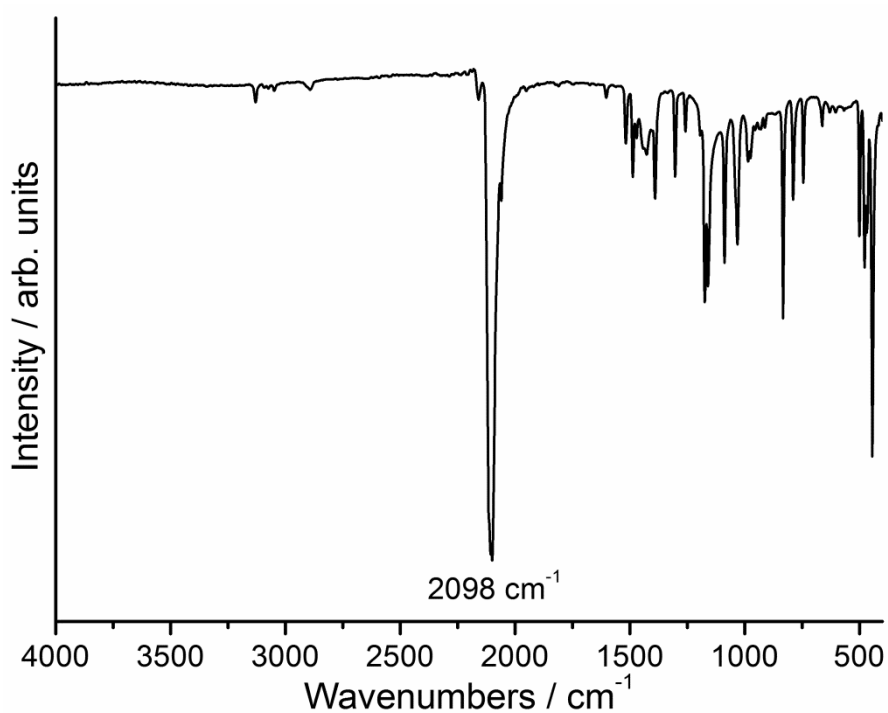

**Fig. S17.** IR spectrum of the residue, which was obtained in the second heating step of compound **2-Co**.

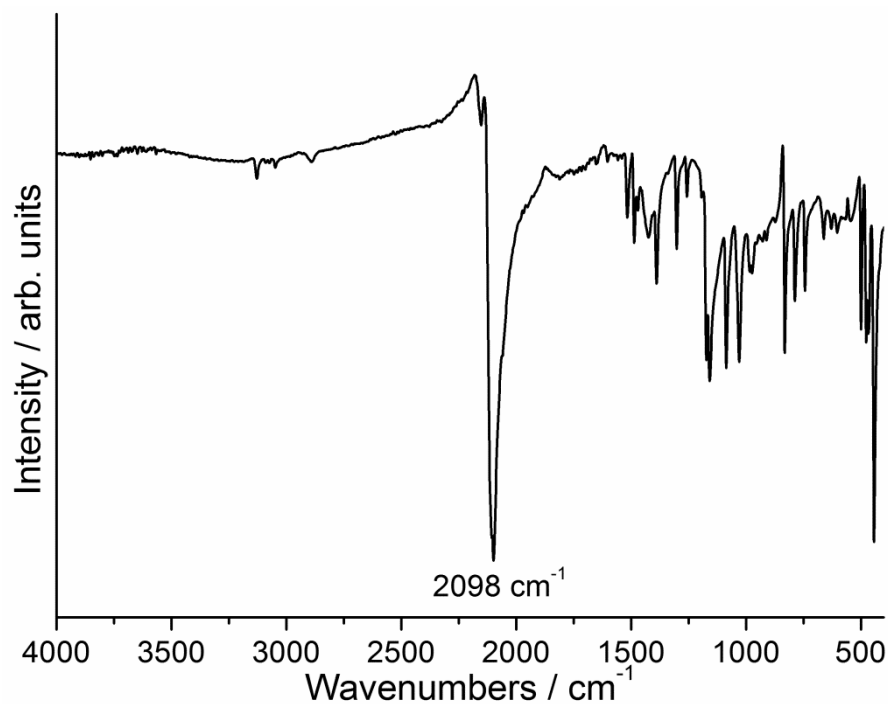

**Fig. S18.** IR spectrum of the residue, which was obtained in the second heating step of compound **3-Co**.

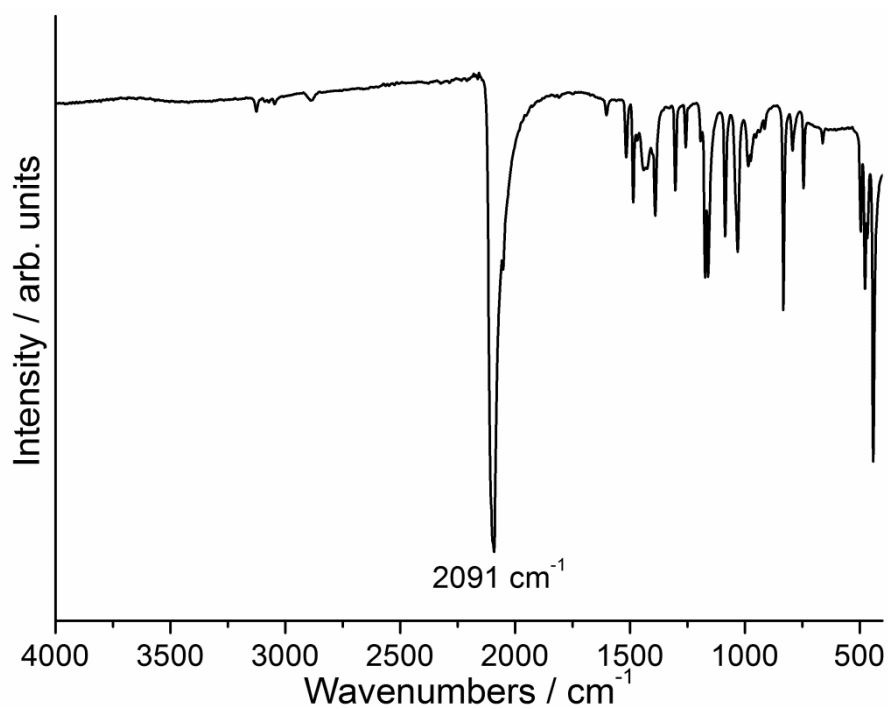

**Fig. S19.** IR spectrum of the residue, which was obtained in the second heating step of compound **1-Fe**.

**Table S3.** Selected bond lengths / Å and angles / ° for  $[\text{Cd}(\text{NCS})_2(2\text{-methylpyrazine})]_n$  (**5-Cd**). Symmetry transformation used to generate equivalent atoms: A = -x, -y + 2, -z + 1; B = -x + 1/2, y + 1/2, -z + 1/2; C = x - 1/2, -y + 3/2, z - 1/2.

|                    |            |                    |             |
|--------------------|------------|--------------------|-------------|
| Cd(1)-N(1)         | 2.2751(19) | Cd(1)-N(11C)       | 2.4582(17)  |
| Cd(1)-N(2)         | 2.320(2)   | Cd(1)-S(1A)        | 2.6769(6)   |
| Cd(1)-N(12)        | 2.4260(18) | Cd(1)-S(2B)        | 2.6842(6)   |
| N(1)-Cd(1)-N(2)    | 171.84(8)  | N(2)-Cd(1)-S(1A)   | 84.75(6)    |
| N(1)-Cd(1)-N(12)   | 86.51(7)   | N(12)-Cd(1)-S(1A)  | 91.75(5)    |
| N(2)-Cd(1)-N(12)   | 85.60(7)   | N(11C)-Cd(1)-S(1A) | 90.64(5)    |
| N(1)-Cd(1)-N(11C)  | 101.36(7)  | N(1)-Cd(1)-S(2B)   | 93.83(5)    |
| N(2)-Cd(1)-N(11C)  | 86.62(7)   | N(2)-Cd(1)-S(2B)   | 88.03(6)    |
| N(12)-Cd(1)-N(11C) | 171.62(6)  | N(12)-Cd(1)-S(2B)  | 88.35(5)    |
| N(1)-Cd(1)-S(1A)   | 93.41(5)   | N(11C)-Cd(1)-S(2B) | 88.26(5)    |
|                    |            | S(1A)-Cd(1)-S(2B)  | 172.753(18) |

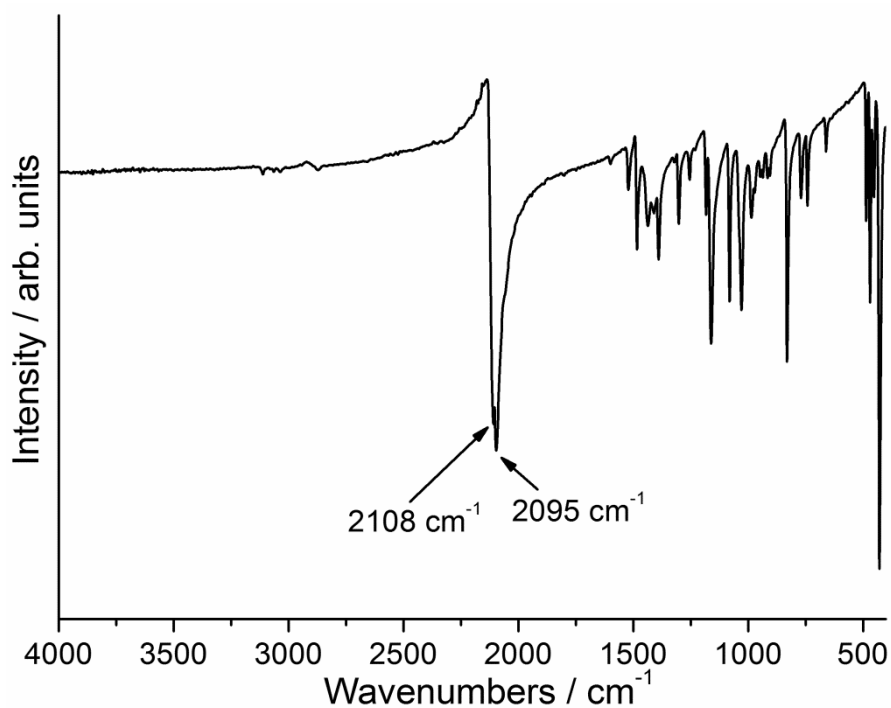

**Fig. S20.** IR spectrum of compound  $[\text{Cd}(\text{NCS})_2(2\text{-methylpyrazine})]_n$  (**5-Cd**).

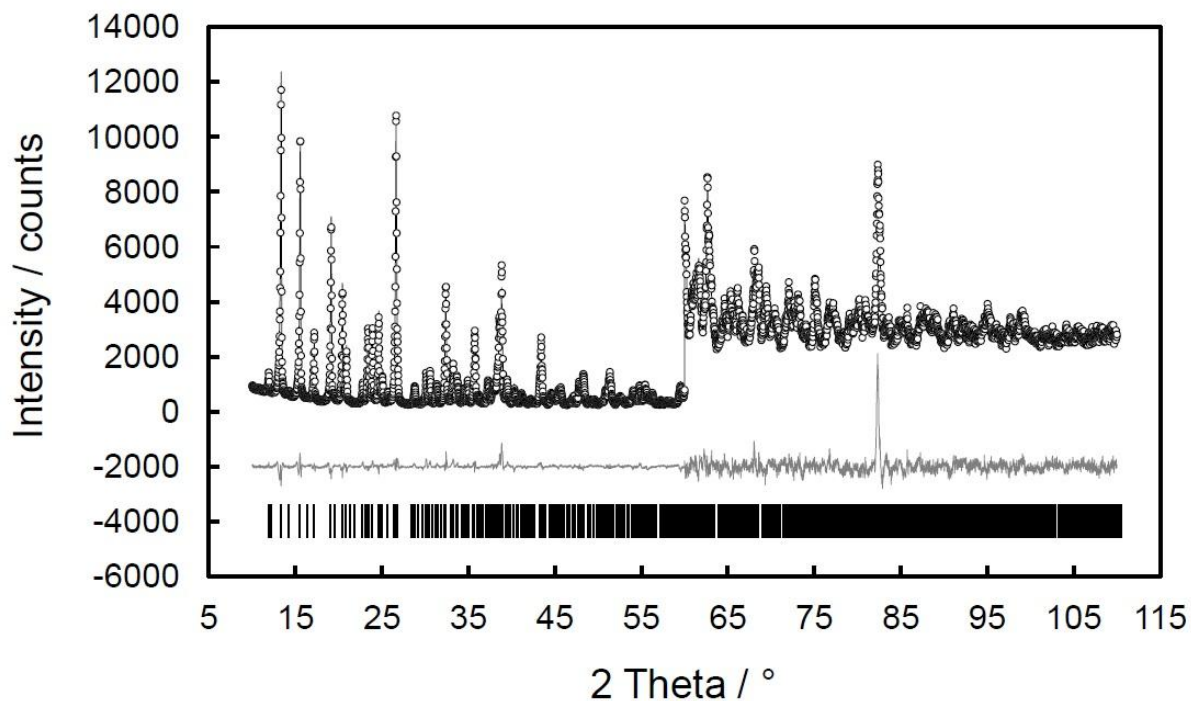

**Fig. S21.** Difference plot from the Rietveld refinement of  $[\text{Co}(\text{NCS})_2(2\text{-methylpyrazine})]_n$  (**5-Co**). Given are observed intensities (circles), calculated intensities (line), the difference (below, arbitrary offset for improved visibility) and the tic-marks for the reflection positions. For the second measurement ( $60\text{-}110^\circ$   $2\theta$ ), intensities were scaled by a factor 5 for the sake of clarity.

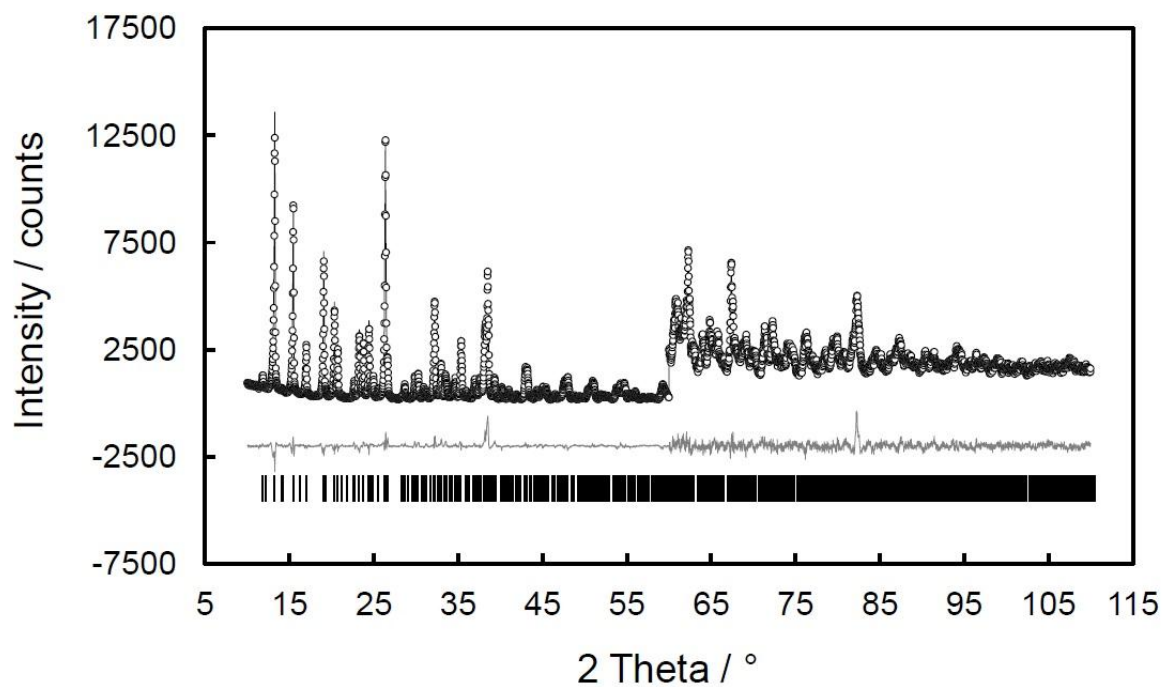

**Fig. S22.** Difference plot from the Rietveld refinement of  $[\text{Fe}(\text{NCS})_2(2\text{-methylpyrazine})]_n$  (**5-Fe**). Given are observed intensities (circles), calculated intensities (line), the difference (below, arbitrary offset for improved visibility) and the tic-marks for the reflection positions. For the second measurement ( $60\text{-}110^\circ$   $2\theta$ ), intensities were scaled by a factor 5 for the sake of clarity.

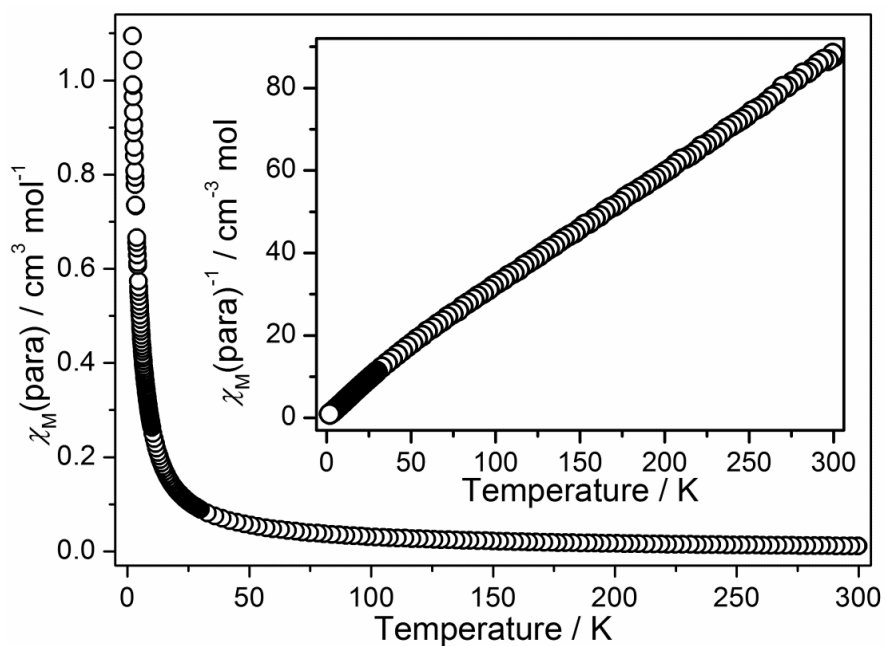

**Fig. S23.** Molar paramagnetic susceptibility ( $\chi_M$ ) and  $1/\chi_M$  (inset) as function of temperature at  $H_{\text{DC}} = 1$  kOe for **4-Co**.

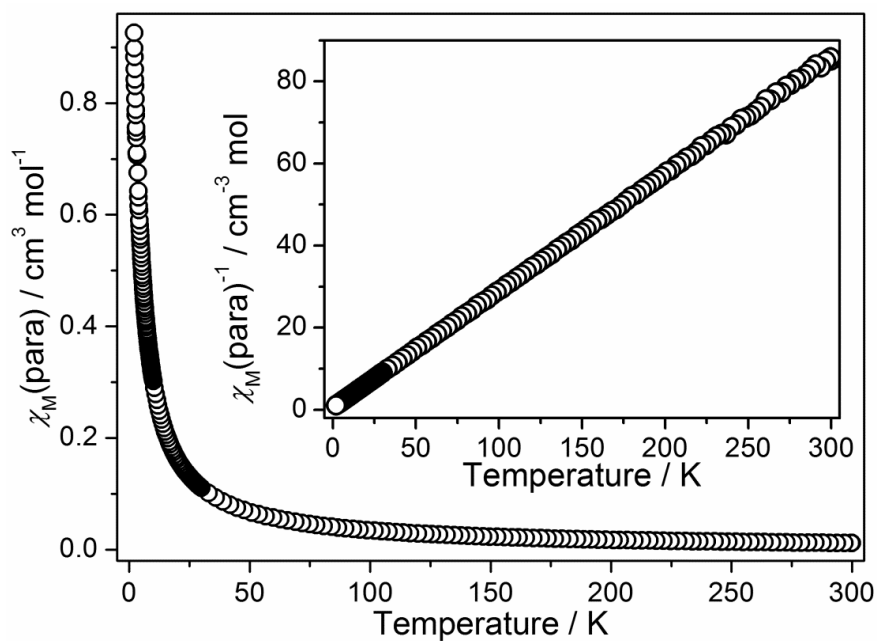

**Fig. S24.** Molar paramagnetic susceptibility ( $\chi_M$ ) and  $1/\chi_M$  (inset) as function of temperature at  $H_{\text{DC}} = 1$  kOe for **4-Fe**.



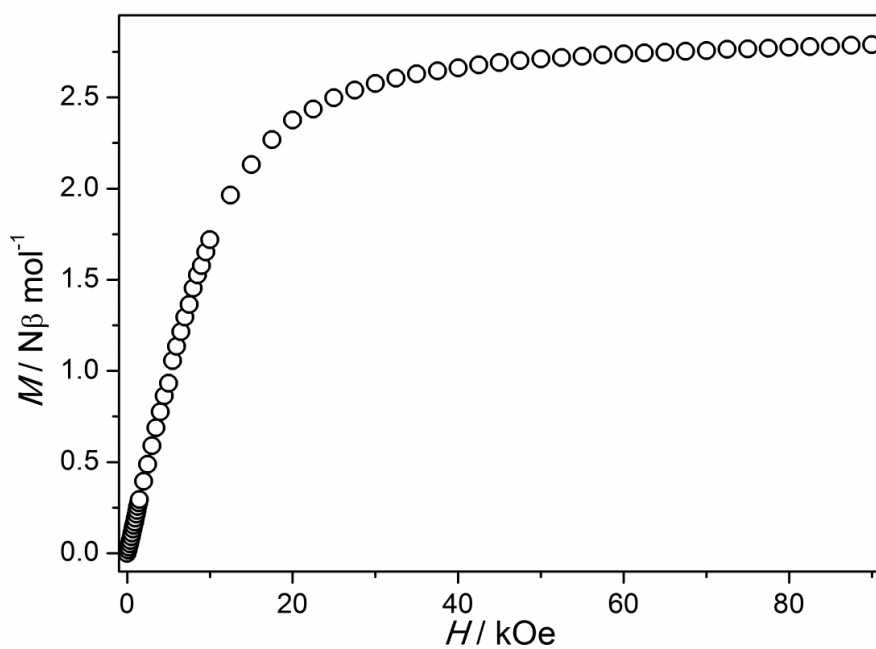

**Fig. S25.** Initial curve in range of 0 – 90 kOe at  $T = 2$  K for **4-Co**.

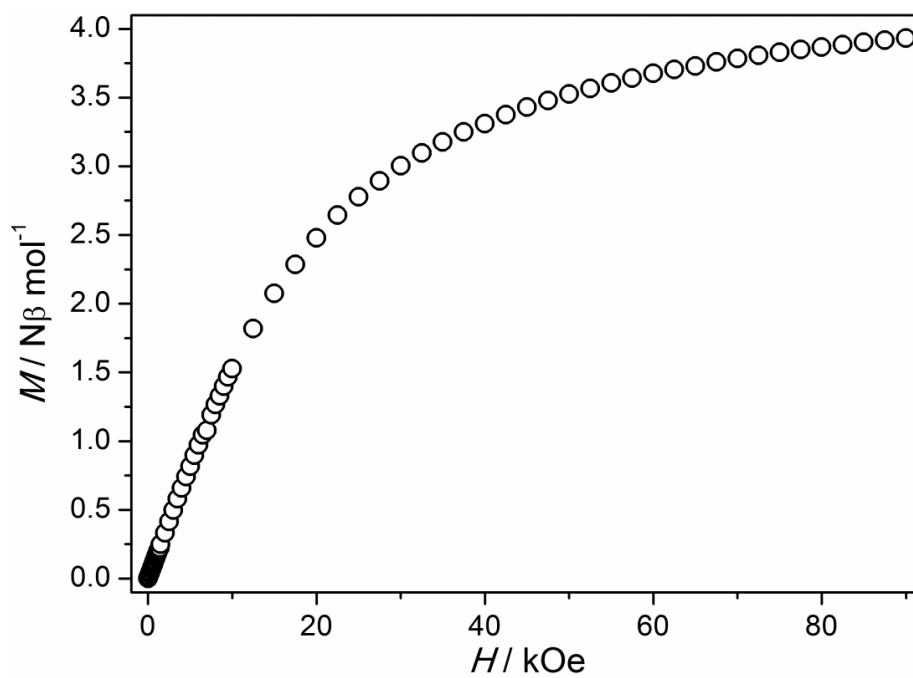

**Fig. S26.** Initial curve in range of 0 – 90 kOe at  $T = 2$  K for **4-Fe**.

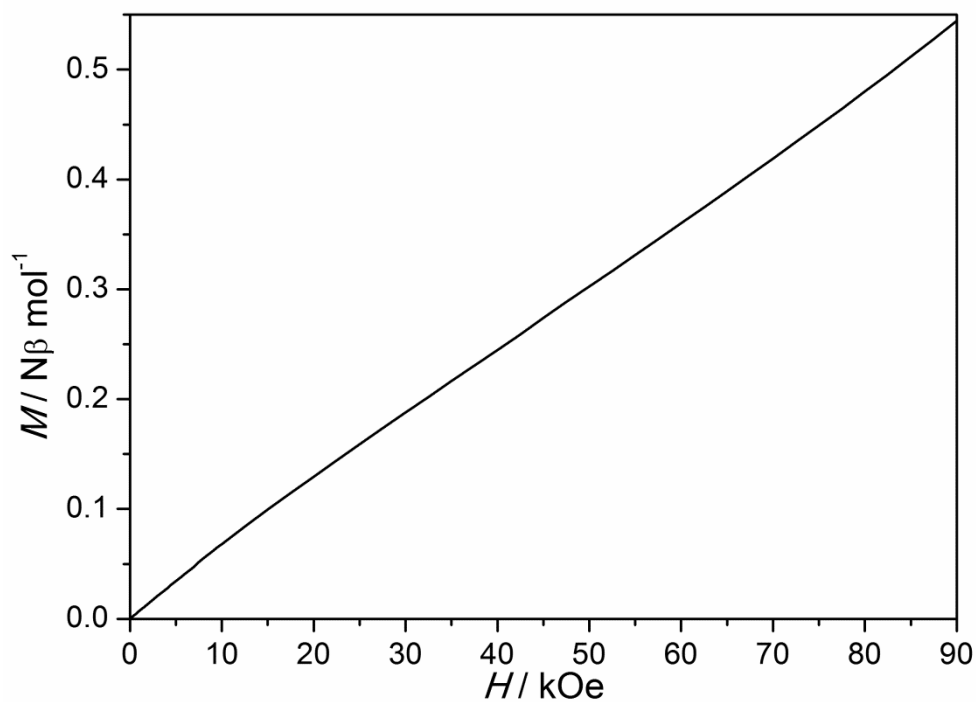

**Fig. S27.** Initial curve in range of 0 – 90 kOe at  $T = 2$  K for **5-Fe**.

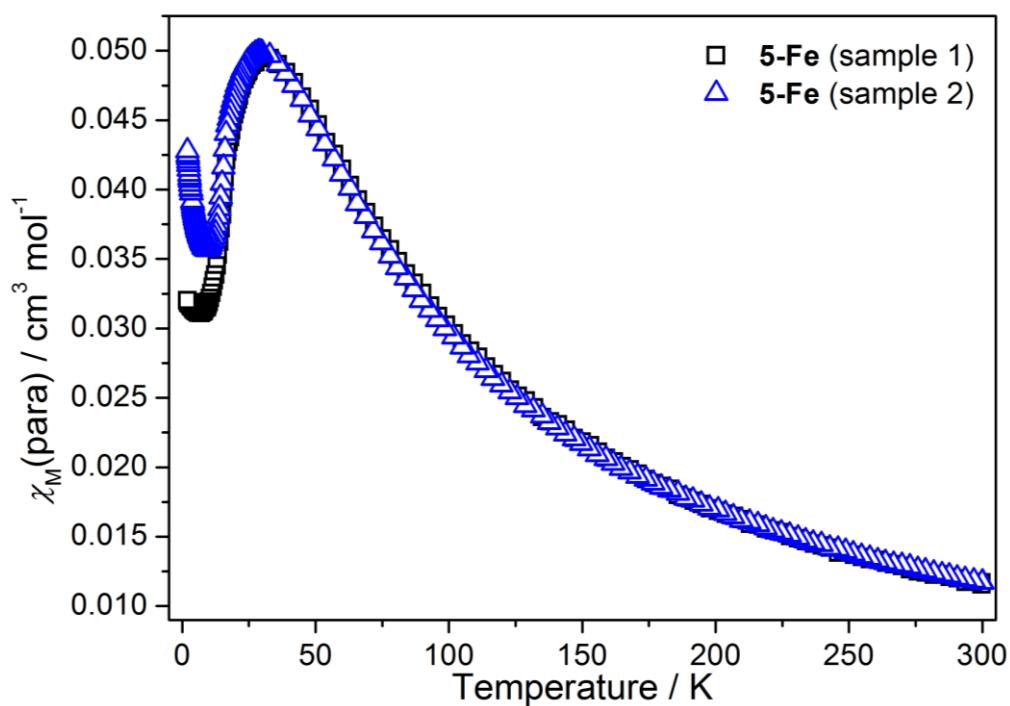

**Fig. S28.** Molar paramagnetic susceptibility ( $\chi_M$ ) as function of temperature at  $H_{\text{DC}} = 1$  kOe for two different batches of **5-Fe**.

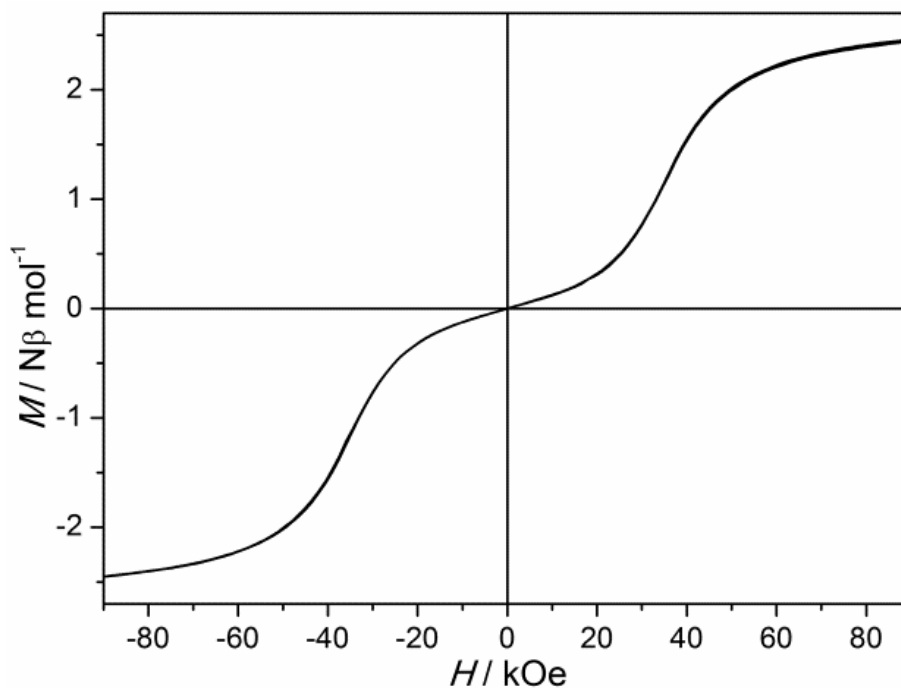

**Fig. S29.** Saturation magnetization experiment at  $T = 2$  K in range of  $\pm 90$  kOe for **5-Co**.

**Table S4.** Results of the magnetic measurements at  $H_{\text{DC}} = 40\text{-}90$  kOe for **5-Co**.

| $H_{\text{DC}} / \text{kOe}$                     | 40    | 50    | 60    | 70    | 80    | 90    |
|--------------------------------------------------|-------|-------|-------|-------|-------|-------|
| $C / \text{cm}^3 \text{K} \cdot \text{mol}^{-1}$ | 3.54  | 3.56  | 3.58  | 3.58  | 3.58  | 3.57  |
| $\theta / \text{K}$                              | -20.5 | -20.6 | -21.2 | -21.4 | -21.7 | -22.2 |
| $\mu_{\text{eff}}(\text{exp}) / \mu_{\text{B}}$  | 5.32  | 5.34  | 5.35  | 5.35  | 5.35  | 5.35  |
| $\mu_{\text{eff}}(\text{exp}) / \mu_{\text{B}}$  | 3.87  |       |       |       |       |       |

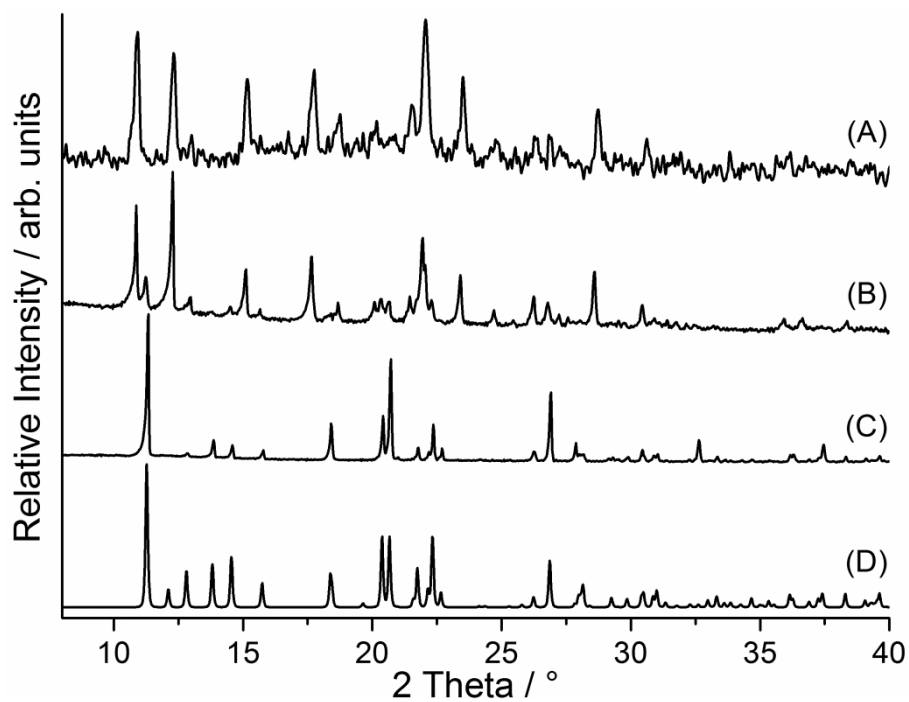

**Fig. S30.** Experimental XRPD of **2-Co** (A) which were stored for 15 min. (B) and for 1 d in a humid atmosphere (C) together with the calculated powder pattern for **1-Co** (D).
